# Supplementary material for: Alopecia areata susceptibility variant in MHC region impacts expressions of genes contributing to hair keratinization and is involved in hair loss
Source: PubMed Central journal article supplement — eBioMedicine. 2020 Jun 21;57:102810. doi: 10.1016/j.ebiom.2020.102810 (PMC7317227; doi:10.1016/j.ebiom.2020.102810), 2020-06-21
Supplement: mmc2.pdf [file mmc2.pdf]

## Supplementary Table 1

### Microsatellites and the primers

| Locus          | in hg19           |                                        |                | Primer sequence            |                            | (°C) <sup>c</sup> |
|----------------|-------------------|----------------------------------------|----------------|----------------------------|----------------------------|-------------------|
|                | Physical position | Repeat unit <sup>a</sup>               | H <sup>b</sup> | Forward                    | Reverse                    |                   |
| <i>D6S2840</i> | 30407655-30407851 | (CT) <sub>14</sub>                     | 0.890          | AGATGGCATTGGAGAGTGCAG      | TCCTTACAGCAGAGATATGTGG     | 57                |
| <i>D6S2799</i> | 30475190-30475416 | (AAAG) <sub>7</sub>                    | 0.495          | TTCCGAGCAGTCTTCATTGG       | TGAGGCAGGAGAATCGCTTG       | 59                |
| <i>D6S2827</i> | 30781051-30781275 | (GT) <sub>9</sub>                      | 0.703          | GAGCCACGGAGAGTCTCCCTTTATC  | TCCAGGAACTGTGAGTAGTAAGAAC  | 57                |
| <i>D6S2825</i> | 30859182-30859405 | (GT) <sub>14</sub>                     | 0.765          | CCATCCCTCTTCTCAGCTCTTCCATC | TGTGGGGCAGACAATGTATTTATCTG | 57                |
| <i>D6S2938</i> | 31061596-31062014 | (ATTT) <sub>7</sub>                    | 0.572          | AACCCAGGGAATCCTAGAAG       | CAGTAGCTTTAGTCTTTCCC       | 57                |
| <i>D6S2931</i> | 31204137-31204564 | (TTTC) <sub>19</sub>                   | 0.859          | CAGCTGCTAGGTGTATCTGAATAC   | CAATAAGAAATTTTGTATAAGGTAAG | 57                |
| <i>D6S2930</i> | 31209069-31209484 | (CTTC) <sub>8</sub>                    | 0.860          | TAGAAAACGCAATCTCGGCC       | CTGGATTAACCTGGAGACTC       | 57                |
| <i>D6S2811</i> | 31259102-31259301 | (GT) <sub>23</sub>                     | 0.903          | CAGTAGTAAGCCAGAAGCTATTAC   | AAGTCAAGCATATCTGCCATTTGG   | 57                |
| <i>MICA</i>    | 31380107-31380335 | (GCT) <sub>2</sub> G(GCT) <sub>3</sub> | 0.777          | GTGCTGGTGCTTCAGAGTCATT     | CCTTGTCACCAACATGCCTA       | 60                |
| <i>D6S2793</i> | 31471706-31471915 | (TG) <sub>19</sub>                     | 0.791          | ATGGGCAAGACTTCAATGGC       | CTACCTCCTTGCCAAACTTG       | 59                |
| <i>D6S2780</i> | 31709084-31709237 | (AC) <sub>23</sub>                     | 0.819          | GCTGCAGTGAGCCAAGATTG       | TCCTCTGCTCTCTGGGATTG       | 62                |
| <i>D6S2924</i> | 31836518-31836670 | (CAAA) <sub>8</sub>                    | 0.721          | GGACATTGCTCTGACTTGAG       | AGCTGAGATTGCACTGCTG        | 59                |
| <i>D6S2973</i> | 31906110-31906336 | (TA) <sub>8</sub>                      | 0.163          | ATGAGGATACCCACTCTACC       | AGTTCGCACCACTGTAGTCC       | 59                |
| <i>D6S2920</i> | 32045736-32045948 | (GAAA) <sub>15</sub>                   | 0.868          | CCTGACCACAAAGCTTTTCTC      | AAAGGTTGCACTGAGCCAAG       | 56                |
| <i>D6S2740</i> | 32219824-32220146 | (TG) <sub>10</sub>                     | 0.703          | ACCTGGTACATTCCTAAAGCC      | ATGTGAGGATAGATCTCTGGG      | 53                |
| <i>D6S2892</i> | 32269688-32269904 | (ATA) <sub>9</sub>                     | 0.812          | ACTCAACCCTGCTGTTGTAG       | TGCATGTCCTGTGAGGTAAG       | 53                |
| <i>D6S2885</i> | 32341989-32342152 | (TG) <sub>22</sub>                     | 0.789          | AGGTGACCTGGACCTTACTG       | ACACTATGCTAGTCTGTGCC       | 57                |
| <i>D6S2883</i> | 32403351-32403488 | (AC) <sub>7</sub>                      | 0.795          | ACATTATGTTCTGTTCATG        | TACTTTCCTAATTCTCTCC        | 57                |
| <i>D6S2876</i> | 32670036-32670255 | (GT) <sub>14</sub>                     | 0.688          | GACAGCTCTTCTAACCTGC        | GGTAAAATTCCTGACTGGCC       | 57                |
| <i>D6S2818</i> | 32737264-32737397 | (TTTG) <sub>8</sub>                    | 0.701          | ATGAAGTGAGCTGTGATCGC       | AGAGCTGCAGTGTGTATTG        | 59                |
| <i>D6S2820</i> | 32817465-32817660 | (CAAA) <sub>4</sub>                    | 0.213          | AGATCCTGGCTTGATGATGC       | TTGCAGTGAGCCCAGATC         | 62                |
| <i>D6S2822</i> | 32853912-32854116 | (TATC) <sub>12</sub>                   | 0.673          | TCACTCATGGTTGCTTTTCC       | GAATGATAGGAGTCCATTGTGG     | 57                |

<sup>a</sup>Repeat unit sequence are referred for the UCSC Genome Browser assembly GRCh37/hg19. <sup>b</sup>Heterozygosity of each microsatellite in the control subjects. <sup>c</sup>Annealing Temperature in each PCR reaction.

**Supplementary Table 2**

**Overview of sequencing output by NGS**

|          |         | Haplotype1     |   |                | Haplotype2 |                |                | Sequencing status |              |   |                |                    |          |               |              |                     |               |                |                |
|----------|---------|----------------|---|----------------|------------|----------------|----------------|-------------------|--------------|---|----------------|--------------------|----------|---------------|--------------|---------------------|---------------|----------------|----------------|
| Subjects |         | <i>D6S2930</i> | - | <i>HLA-C</i>   | -          | <i>D6S2811</i> | <i>D6S2930</i> | -                 | <i>HLA-C</i> | - | <i>D6S2811</i> | Yield (mega bases) | Reads    | Average bases | Mapped reads | Paired mapped reads | Mean coverage | % target bases | % target bases |
|          |         |                |   |                |            |                |                |                   |              |   |                |                    |          |               |              |                     |               | at >=10X       | at >=20X       |
| AA083    | Case    | <b>441</b>     | - | <b>C*04:01</b> | -          | <b>208</b>     | 437            | -                 | C*15:02      | - | 194            | 2320               | 22841942 | 101.6         | 13757754     | 13610648            | 280.5         | 94.5           | 93.5           |
| AA086    | Case    | <b>441</b>     | - | <b>C*04:01</b> | -          | <b>208</b>     | 437            | -                 | C*15:02      | - | 194            | 2300               | 22648454 | 101.5         | 12369001     | 12232126            | 251.8         | 95.2           | 94.1           |
| AA211    | Case    | <b>441</b>     | - | <b>C*04:01</b> | -          | <b>208</b>     | 429            | -                 | C*12:02      | - | 204            | 2039               | 20070420 | 101.6         | 11998428     | 11833266            | 244.5         | 96.0           | 95.1           |
| AA215    | Case    | <b>441</b>     | - | <b>C*04:01</b> | -          | <b>208</b>     | 441            | -                 | C*03:04      | - | 194            | 2070               | 20344272 | 101.8         | 13126105     | 12854246            | 267.7         | 94.8           | 93.7           |
| AA267    | Case    | <b>441</b>     | - | <b>C*04:01</b> | -          | <b>208</b>     | 433            | -                 | C*07:02      | - | 192            | 2372               | 23179050 | 102.3         | 8518411      | 8425394             | 174.3         | 94.5           | 92.9           |
| AA214    | Case    | 437            | - | C*03:03        | -          | 196            | 441            | -                 | C*03:03      | - | 196            | 1970               | 19313488 | 102.0         | 11133559     | 11000613            | 227.7         | 94.9           | 93.8           |
| AA249    | Case    | 437            | - | C*01:02        | -          | 216            | 441            | -                 | C*01:02      | - | 216            | 2363               | 23107648 | 102.3         | 13823924     | 13678332            | 283.5         | 95.1           | 94.2           |
| AA289    | Case    | 437            | - | C*01:02        | -          | 212            | 433            | -                 | C*03:03      | - | 196            | 2020               | 19820778 | 101.9         | 11607431     | 11448500            | 237.2         | 96.0           | 95.1           |
| AA292    | Case    | 409            | - | C*07:02        | -          | 196            | 445            | -                 | C*01:02      | - | 212            | 2040               | 20035423 | 101.8         | 12452906     | 12280422            | 254.4         | 95.5           | 94.5           |
| AA298    | Case    | 433            | - | C*04:01        | -          | 210            | 469            | -                 | C*14:03      | - | 216            | 2210               | 21667416 | 102.0         | 13204169     | 13036608            | 270.0         | 95.3           | 94.3           |
| T416     | Control | 437            | - | C*01:02        | -          | 212            | 469            | -                 | C*14:03      | - | 216            | 2035               | 19952372 | 102.0         | 12467409     | 12320619            | 255.1         | 95.5           | 94.6           |
| T438     | Control | 409            | - | C*07:02        | -          | 196            | 461            | -                 | C*14:02      | - | 198            | 2165               | 21199733 | 102.1         | 12264395     | 12065036            | 250.8         | 95.5           | 94.6           |

Risk haplotypes associated with AA are shown in bold.

**Supplementary Table 3**

**Primer sets for PCR direct sequencing in all exons of *CCHCR1* gene**

| Target exon | Amplicon size (bp) | Physical position | Amplification and sequencing primer |                           | (°C) <sup>a</sup> | Additional sequencing primer                 |
|-------------|--------------------|-------------------|-------------------------------------|---------------------------|-------------------|----------------------------------------------|
|             |                    |                   | Forward                             | Reverse                   |                   |                                              |
| 01 - 03     | 1,299              | 31124423-31125721 | GGGCAGGCTATTGAGAGATGG               | GGCCGAAATAGGGTAAGGAGTT    | 61                | GGATTATGACTTTGTTATTGTAGG                     |
| 04          | 464                | 31122226-31122689 | TCCCCACACGGAAGCAGAGG                | CCCAGCTCTCCGTTATGAATTTGA  | 65                | AGGGGTCCTCTTTTCCTTCT                         |
| 05 - 08     | 1,248              | 31117761-31119008 | GCTGATTGGTTGGGTCATTCTCTA            | AACACTGGTTGAATGGATGCCAC   | 63                | AGGAGCGTGTAGAGCACAGC<br>AGCTCATGTTGCCCAGGCAG |
| 9 - 10      | 576                | 31116034-31116609 | GCATGGCATTCTTACAGAGATCTC            | GGAACATTGATAGAGCTAAATCTGC | 59                |                                              |
| 11 - 15     | 1,333              | 31112369-31113701 | TGCGTTCTGTACTTGTATAATGGGAC          | TGAAGCTTTGAACACACTTTGAGG  | 61                | GCTGGGACCCCCAAAACCAT                         |
| 16 - 18     | 1,148              | 31110146-31111293 | AGCCACAGAGTTGGTGACCCAG              | AATCTCCAAGAGAGATGGCTGCA   | 64                | TCTCCATTCTCATTCC<br>CAGCGTTTGTTCCTGTCTTC     |

<sup>a</sup>Annealing temperature used for each PCR reaction.

**Supplementary Table 4**  
**Allelic association analysis of 23 loci spanning 2.45 Mb in the MHC region**

| Locus                      | For locus                 |                  |         | For an allele in each locus |                  |         |                                  |          |   |          |                         |
|----------------------------|---------------------------|------------------|---------|-----------------------------|------------------|---------|----------------------------------|----------|---|----------|-------------------------|
|                            | No of allele <sup>a</sup> | HWE <sup>b</sup> |         | Allele <sup>c</sup>         | Allele frequency |         | Allelic association <sup>d</sup> |          |   |          |                         |
|                            |                           | Case             | Control |                             | Case             | Control | OR                               | (95% CI) |   | <i>P</i> |                         |
| <i>D6S2840</i>             | 19                        | 0.549            | 0.295   | <i>217</i>                  | 0.073            | 0.049   | 1.51                             | 0.93     | - | 2.46     | 1.02 x 10 <sup>-1</sup> |
| <i>D6S2799</i>             | 3                         | 0.107            | 0.335   | <i>222</i>                  | 0.693            | 0.649   | 1.22                             | 0.93     | - | 1.60     | 1.52 x 10 <sup>-1</sup> |
| <i>D6S2827</i>             | 8                         | 0.212            | 0.917   | <i>218</i>                  | 0.105            | 0.054   | 1.99                             | 1.30     | - | 3.06     | 2.03 x 10 <sup>-3</sup> |
| <i>D6S2825</i>             | 14                        | 0.138            | 0.445   | <i>235</i>                  | 0.298            | 0.370   | 0.73                             | 0.57     | - | 0.95     | 1.66 x 10 <sup>-2</sup> |
| <i>D6S2938</i>             | 6                         | 0.057            | 0.781   | <i>429</i>                  | 0.158            | 0.104   | 1.60                             | 1.13     | - | 2.27     | 9.41 x 10 <sup>-3</sup> |
| <i>D6S2931</i>             | 17                        | 0.211            | 0.380   | <i>371</i>                  | 0.234            | 0.170   | 1.48                             | 1.10     | - | 1.97     | 9.89 x 10 <sup>-3</sup> |
| <i>D6S2930</i>             | 15                        | 0.187            | 0.265   | <i>441</i>                  | 0.228            | 0.144   | 1.81                             | 1.32     | - | 2.48     | 2.54 x 10 <sup>-4</sup> |
| <i>HLA-C</i>               | 17                        | 0.043            | 0.424   | <i>C*04:01</i>              | 0.082            | 0.036   | 2.47                             | 1.48     | - | 4.11     | 5.33 x 10 <sup>-4</sup> |
| <i>D6S2811<sup>c</sup></i> | 21                        | 0.368            | 0.014   | <i>208</i>                  | 0.076            | 0.025   | 3.41                             | 1.94     | - | 5.99     | 3.39 x 10 <sup>-5</sup> |
| <i>MICA</i>                | 5                         | 0.933            | 0.056   | <i>A5</i>                   | 0.371            | 0.293   | 1.43                             | 1.10     | - | 1.84     | 6.77 x 10 <sup>-3</sup> |
| <i>D6S2793</i>             | 16                        | 0.807            | 0.549   | <i>224</i>                  | 0.020            | 0.004   | 4.74                             | 1.48     | - | 15.1     | 8.92 x 10 <sup>-3</sup> |
| <i>D6S2780</i>             | 19                        | 0.914            | 0.325   | <i>161</i>                  | 0.012            | 0.003   | 4.45                             | 0.99     | - | 20.1     | 5.43 x 10 <sup>-2</sup> |
| <i>D6S2924</i>             | 8                         | 0.113            | 0.873   | <i>158</i>                  | 0.181            | 0.146   | 1.31                             | 0.94     | - | 1.82     | 1.10 x 10 <sup>-1</sup> |
| <i>D6S2973</i>             | 4                         | 0.828            | 0.721   | <i>232</i>                  | 0.012            | 0.004   | 3.33                             | 0.82     | - | 13.5     | 1.00 x 10 <sup>-1</sup> |
| <i>D6S2920</i>             | 15                        | 0.631            | 0.396   | <i>208</i>                  | 0.135            | 0.095   | 1.50                             | 1.03     | - | 2.18     | 3.80 x 10 <sup>-2</sup> |
| <i>D6S2740</i>             | 5                         | 0.204            | 0.740   | <i>322</i>                  | 0.155            | 0.235   | 0.59                             | 0.43     | - | 0.82     | 1.16 x 10 <sup>-3</sup> |
| <i>D6S2892</i>             | 11                        | 0.271            | 0.441   | <i>206</i>                  | 0.079            | 0.102   | 0.76                             | 0.49     | - | 1.17     | 2.02 x 10 <sup>-1</sup> |
| <i>D6S2885</i>             | 17                        | 0.097            | 0.306   | <i>162</i>                  | 0.070            | 0.038   | 1.88                             | 1.12     | - | 3.14     | 1.34 x 10 <sup>-2</sup> |
| <i>D6S2883</i>             | 9                         | 0.248            | 0.248   | <i>138</i>                  | 0.184            | 0.246   | 0.70                             | 0.51     | - | 0.94     | 1.71 x 10 <sup>-2</sup> |
| <i>D6S2876</i>             | 8                         | 0.264            | 0.346   | <i>215</i>                  | 0.152            | 0.121   | 1.30                             | 0.92     | - | 1.85     | 1.42 x 10 <sup>-1</sup> |
| <i>D6S2818</i>             | 5                         | 0.846            | 0.450   | <i>124</i>                  | 0.120            | 0.188   | 0.59                             | 0.41     | - | 0.85     | 2.63 x 10 <sup>-3</sup> |
| <i>D6S2820</i>             | 2                         | 0.475            | 0.321   | <i>194</i>                  | 0.120            | 0.121   | 0.99                             | 0.68     | - | 1.43     | 9.39 x 10 <sup>-1</sup> |
| <i>D6S2822</i>             | 8                         | 0.959            | 0.167   | <i>196</i>                  | 0.257            | 0.220   | 1.24                             | 0.93     | - | 1.66     | 1.40 x 10 <sup>-1</sup> |

Allelic association analysis of 23 loci spanning 2.45 Mb in the MHC region. <sup>a</sup>Number of alleles observed in each locus. <sup>b</sup>*P*-values for exact test of Hardy-Weinberg proportion. <sup>c</sup>Allele showing smallest *P*-value and greater than 0.01 allele frequency in case subjects among all alleles. <sup>d</sup>*D6S2811* was shown to be a statistically significant locus. The *P*-value for significance after Bonferroni correction was below 1.98x10<sup>-4</sup> in all statistical tests (252 tests).

**Supplementary Table 5****Allelic association analysis of *HLA-C* gene**

| Allele         | Allele frequency |        | Allelic association |          |        | <i>P</i>                |
|----------------|------------------|--------|---------------------|----------|--------|-------------------------|
|                | Case             | Cont   | OR                  | (95% CI) |        |                         |
| <i>C*01:02</i> | 0.1579           | 0.1821 | 0.84                | 0.60     | - 1.17 | 2.92 x 10 <sup>-1</sup> |
| <i>C*01:03</i> | 0.0000           | 0.0054 | 0.00                | -        | -      | 3.45 x 10 <sup>-1</sup> |
| <i>C*03:02</i> | 0.0146           | 0.0063 | 2.09                | 0.71     | - 6.16 | 2.63 x 10 <sup>-1</sup> |
| <i>C*03:03</i> | 0.1491           | 0.1295 | 1.18                | 0.83     | - 1.68 | 3.49 x 10 <sup>-1</sup> |
| <i>C*03:04</i> | 0.0848           | 0.1268 | 0.62                | 0.41     | - 0.96 | 2.51 x 10 <sup>-2</sup> |
| <i>C*04:01</i> | 0.0819           | 0.0357 | 2.47                | 1.48     | - 4.11 | 5.33 x 10 <sup>-4</sup> |
| <i>C*05:01</i> | 0.0029           | 0.0036 | 0.82                | 0.09     | - 7.36 | 8.55 x 10 <sup>-1</sup> |
| <i>C*06:02</i> | 0.0000           | 0.0054 | 0.00                | -        | -      | 3.45 x 10 <sup>-1</sup> |
| <i>C*07:02</i> | 0.1754           | 0.1232 | 1.48                | 1.07     | - 2.04 | 1.96 x 10 <sup>-2</sup> |
| <i>C*07:04</i> | 0.0117           | 0.0161 | 0.72                | 0.24     | - 2.16 | 5.47 x 10 <sup>-1</sup> |
| <i>C*08:01</i> | 0.0731           | 0.0857 | 0.84                | 0.52     | - 1.33 | 4.45 x 10 <sup>-1</sup> |
| <i>C*08:03</i> | 0.0117           | 0.0107 | 1.09                | 0.35     | - 3.44 | 8.79 x 10 <sup>-1</sup> |
| <i>C*12:02</i> | 0.0819           | 0.1143 | 0.70                | 0.46     | - 1.06 | 8.42 x 10 <sup>-2</sup> |
| <i>C*12:03</i> | 0.0000           | 0.0009 | 0.00                | -        | -      | 8.42 x 10 <sup>-1</sup> |
| <i>C*14:02</i> | 0.0468           | 0.0670 | 0.67                | 0.38     | - 1.18 | 4.10 x 10 <sup>-1</sup> |
| <i>C*14:03</i> | 0.0526           | 0.0652 | 0.80                | 0.47     | - 1.35 | 7.11 x 10 <sup>-1</sup> |
| <i>C*15:02</i> | 0.0556           | 0.0223 | 2.45                | 1.34     | - 4.46 | 4.32 x 10 <sup>-3</sup> |

**Supplementary Table 6****Filtering of variants identified by MHC region sequencing**

---

| No of variant | Filtering parameters                                                 |
|---------------|----------------------------------------------------------------------|
| 77,040        | ← Total variants observed in 12 individuals                          |
| ↓             | → Excluding variants in segmental duplication regions                |
| 60,255        |                                                                      |
| ↓             | → Excluding variants in control individuals                          |
| 32,256        |                                                                      |
| ↓             | → Excluding variants in individuals with non-risk haplotype          |
| 9,290         |                                                                      |
| ↓             | ← Selecting heterozygous variants in individuals with risk haplotype |
| 3,895         |                                                                      |

---

Supplementary Table 7

## Overview of 16 variants identical in 5 individuals with risk haplotype

| Physical position |          | Ref <sup>a</sup> | Alt <sup>b</sup> | SNV ID      | Function (gene)            | Annotation by<br>RepeatMasker <sup>c</sup> | 1000 Genomes <sup>d</sup> |            |            | Sequencing reads in resequencing by NGS |                  |                  |                  |                  |                  |                  |                  |                  |                  |                        |
|-------------------|----------|------------------|------------------|-------------|----------------------------|--------------------------------------------|---------------------------|------------|------------|-----------------------------------------|------------------|------------------|------------------|------------------|------------------|------------------|------------------|------------------|------------------|------------------------|
| Start             | End      |                  |                  |             |                            |                                            | CEU                       | CHB        | JPT        | AA083                                   |                  | AA086            |                  | AA211            |                  | AA215            |                  | AA267            |                  | Mean of<br>total reads |
|                   |          |                  |                  |             |                            |                                            |                           |            |            | Ref <sup>e</sup>                        | Alt <sup>f</sup> | Ref <sup>e</sup> | Alt <sup>f</sup> | Ref <sup>e</sup> | Alt <sup>f</sup> | Ref <sup>e</sup> | Alt <sup>f</sup> | Ref <sup>e</sup> | Alt <sup>f</sup> |                        |
| 31112701          | 31112701 | G                | A                | rs142986308 | exonic ( <i>CCHCR1</i> )   | Non                                        | A=0.0000                  | A=0.0309   | A=0.0169   | 86                                      | 117              | 114              | 126              | 56               | 97               | 123              | 115              | 44               | 83               | 192                    |
| 31162402          | 31162402 | C                | T                | rs140726956 | intergenic                 | L2b                                        | T=0.0000                  | T=0.0309   | T=0.0112   | 425                                     | 329              | 387              | 400              | 431              | 476              | 378              | 438              | 230              | 243              | 747                    |
| 31253444          | 31253444 | C                | T                | rs9461684   | intergenic                 | Non                                        | T=0.1000                  | T=0.0722   | T=0.0169   | 189                                     | 161              | 144              | 138              | 171              | 176              | 136              | 178              | 83               | 108              | 297                    |
| 31253866          | 31253866 | G                | A                | rs9468919   | intergenic                 | Non                                        | A=0.1000                  | A=0.0722   | A=0.0169   | 250                                     | 208              | 156              | 157              | 186              | 194              | 210              | 156              | 113              | 100              | 346                    |
| 31255762          | 31255762 | A                | C                | rs28577989  | intergenic                 | Non                                        | C=0.0765                  | C=0.0670   | C=0.0169   | 269                                     | 268              | 332              | 281              | 198              | 239              | 247              | 203              | 161              | 174              | 474                    |
| 31255809          | 31255809 | A                | G                | rs28506073  | intergenic                 | Non                                        | G=0.1000                  | G=0.0722   | G=0.0169   | 289                                     | 263              | 306              | 291              | 225              | 218              | 252              | 233              | 164              | 187              | 486                    |
| 31260888          | 31260888 | G                | A                | rs60582327  | intergenic                 | L1MB8                                      | A=0.1000                  | A=0.0722   | A=0.0169   | 103                                     | 125              | 104              | 117              | 100              | 106              | 99               | 101              | 48               | 70               | 195                    |
| 31272553          | 31272553 | G                | A                | rs9264904   | intergenic                 | MLT1F2                                     | A=0.2765                  | A=0.1907   | A=0.1011   | 423                                     | 422              | 405              | 368              | 380              | 311              | 299              | 301              | 270              | 287              | 693                    |
| 31274582          | 31274582 | G                | A                | rs9468944   | intergenic                 | Non                                        | A=0.1353                  | A=0.0825   | A=0.0169   | 111                                     | 114              | 85               | 100              | 97               | 91               | 93               | 76               | 87               | 47               | 180                    |
| 31435267          | 31435267 | C                | T                | rs147602969 | intergenic                 | ERV3-16A3_I-int                            | T=0.0000                  | T=0.0206   | T=0.0169   | 244                                     | 239              | 233              | 241              | 171              | 227              | 259              | 288              | 175              | 193              | 454                    |
| 31482200          | 31482200 | G                | T                | rs138518912 | intergenic                 | L1M5                                       | T=0.0000                  | T=0.0258   | T=0.0281   | 74                                      | 96               | 94               | 72               | 91               | 100              | 88               | 70               | 71               | 44               | 160                    |
| 31510328          | 31510343 | TGTCCGAGGTAGCTGA | Deletion         | rs201744045 | intergenic                 | Non                                        | Del=0.0000                | Del=0.0258 | Del=0.0169 | 125                                     | 62               | 127              | 47               | 70               | 45               | 146              | 50               | 63               | 41               | 155                    |
| 31530306          | 31530306 | T                | C                | rs142636125 | intergenic                 | Non                                        | C=0.0000                  | C=0.0258   | C=0.0169   | 117                                     | 109              | 115              | 100              | 78               | 87               | 162              | 139              | 110              | 83               | 220                    |
| 31537331          | 31537331 | A                | G                | rs185544867 | intergenic                 | AluSx                                      | G=0.0000                  | G=0.0258   | G=0.0337   | 41                                      | 58               | 41               | 40               | 45               | 71               | 77               | 66               | 23               | 41               | 101                    |
| 31637474          | 31637474 | C                | T                | rs140257968 | intronic ( <i>CSNK2B</i> ) | Non                                        | T=0.0000                  | T=0.0155   | T=0.0169   | 228                                     | 180              | 266              | 186              | 118              | 90               | 257              | 253              | 110              | 109              | 359                    |
| 31764424          | 31764424 | C                | T                | rs150974840 | intergenic                 | AluSx                                      | T=0.0000                  | T=0.0155   | T=0.0169   | 18                                      | 15               | 21               | 15               | 11               | 16               | 14               | 21               | 18               | 8                | 31                     |

<sup>a</sup>Reference sequence in the UCSC Genome Browser. <sup>b</sup>Sequence observed in 5 individual with risk haplotype. <sup>c</sup>Name of repetitive sequence annotated by RepeatMasker (<http://genome.ucsc.edu/>). <sup>d</sup>Allele frequencies in each population in 1000 genomes Browser (<http://www.ncbi.nlm.nih.gov/variation/tools/1000genomes/>). <sup>e</sup>Sequence read number of reference sequence. <sup>f</sup>Sequence read number of observed variant.

**Supplementary Table 8**

**SNV discovery and allelic association with *CCHCR1***

| SNV         | Physical position | Exon | Substitution <sup>a</sup> |             | Allele | Predicted Coiled-coil <sup>c</sup> | Functional predictions |           |           | Frequency in EA <sup>d</sup> | Allele frequency <sup>e</sup> |         | Allelic association |             |                         |
|-------------|-------------------|------|---------------------------|-------------|--------|------------------------------------|------------------------|-----------|-----------|------------------------------|-------------------------------|---------|---------------------|-------------|-------------------------|
|             |                   |      | cDNA <sup>b</sup>         | Amino acid  |        |                                    | PolyPhen2              | SIFT      | PhyloP    |                              | Case                          | Control | OR                  | (95% CI)    | <i>P</i>                |
| rs72856718  | 31125257          | 01   | c.G121T                   | p.Glu41X    | T      | Non                                | NA                     | NA        | Non       | 0.0854                       | 0.0877                        | 0.0375  | 2.47                | 1.51 - 4.05 | 4.25 x 10 <sup>-4</sup> |
| rs3130453   | 31124849          | 02   | c.G234A                   | p.Trp78X    | A      | Non                                | NA                     | NA        | Non       | 0.4817                       | 0.3684                        | 0.3545  | 1.06                | 0.83 - 1.36 | 6.45 x 10 <sup>-1</sup> |
| rs130075    | 31122502          | 04   | c.G305A                   | p.Arg102Gln | A      | Coiled-coil                        | Probably damaging      | Tolerated | Conserved | 0.0501                       | 0.0906                        | 0.1304  | 0.67                | 0.45 - 1.01 | 4.54 x 10 <sup>-2</sup> |
| rs130065    | 31122500          | 04   | c.C307T                   | p.Arg103Trp | T      | Coiled-coil                        | Benign                 | Tolerated | Conserved | 0.2050                       | 0.0000                        | 0.0054  | -                   | - - -       | 3.45 x 10 <sup>-1</sup> |
| rs130076    | 31122482          | 04   | c.C325T                   | p.Arg109Trp | T      | Coiled-coil                        | Benign                 | Tolerated | Conserved | 0.2100                       | 0.0000                        | 0.0054  | -                   | - - -       | 3.45 x 10 <sup>-1</sup> |
| rs130066    | 31122315          | 04   | c.C492G                   | p.Ser164Arg | G      | Coiled-coil                        | Benign                 | Tolerated | Non       | 0.4288                       | 0.3626                        | 0.3500  | 1.05                | 0.82 - 1.35 | 6.78 x 10 <sup>-1</sup> |
| rs11540822  | 31118898          | 05   | c.T536A                   | p.Leu179Gln | A      | Coiled-coil                        | Possibly damaging      | Damaging  | Conserved | 0.0855                       | 0.0819                        | 0.0375  | 2.41                | 1.45 - 4.03 | 1.08 x 10 <sup>-3</sup> |
| rs130067    | 31118511          | 06   | c.A825C                   | p.Glu275Asp | C      | Coiled-coil                        | Benign                 | Tolerated | Non       | 0.1973                       | 0.3596                        | 0.3446  | 1.06                | 0.83 - 1.36 | 6.19 x 10 <sup>-1</sup> |
| rs2027937   | 31116502          | 09   | c.G1099A                  | p.Ala367Thr | A      | Coiled-coil                        | Benign                 | Tolerated | Conserved | 0.0725                       | 0.0439                        | 0.0223  | 2.06                | 1.06 - 4.00 | 3.95 x 10 <sup>-2</sup> |
| rs130068    | 31116246          | 10   | c.C1249T                  | p.Arg417Trp | T      | Coiled-coil                        | Benign                 | Tolerated | Non       | 0.4444                       | 0.2895                        | 0.2571  | 1.19                | 0.90 - 1.57 | 2.24 x 10 <sup>-1</sup> |
| rs130069    | 31116245          | 10   | c.G1250A                  | p.Arg417Gln | A      | Coiled-coil                        | Benign                 | Tolerated | Conserved | 0.0484                       | 0.0029                        | 0.0045  | 0.65                | 0.08 - 5.63 | 6.85 x 10 <sup>-1</sup> |
| rs147733073 | 31113239          | 12   | c.G1458C                  | p.Gln486His | C      | Non                                | Probably damaging      | Damaging  | Conserved | 0.0002                       | 0.0497                        | 0.0679  | 0.74                | 0.44 - 1.24 | 3.95 x 10 <sup>-1</sup> |
| rs2073720   | 31112823          | 14   | c.A1637G                  | p.Lys546Arg | G      | Coiled-coil                        | Benign                 | Tolerated | Non       | 0.0026                       | 0.1023                        | 0.1250  | 0.79                | 0.53 - 1.18 | 2.44 x 10 <sup>-1</sup> |
| rs750668764 | 31112755          | 14   | c.C1705A                  | p.Leu569Met | A      | Coiled-coil                        | Possibly damaging      | Damaging  | Non       | Non                          | 0.0117                        | 0.0027  | 4.45                | 0.99 - 20.1 | 5.43 x 10 <sup>-2</sup> |
| rs130079    | 31112737          | 14   | c.G1723T                  | p.Gly575Cys | T      | Coiled-coil                        | Benign                 | Tolerated | Non       | 0.2362                       | 0.0000                        | 0.0054  | -                   | - - -       | 1.00                    |
| rs142986308 | 31112701          | 14   | c.C1759T                  | p.Arg587Trp | T      | Coiled-coil                        | Probably damaging      | Damaging  | Conserved | 0.0001                       | 0.0760                        | 0.0250  | 3.41                | 1.94 - 5.99 | 3.39 x 10 <sup>-5</sup> |
| rs202129359 | 31112532          | 15   | c.G1832A                  | p.Arg611Gln | A      | Coiled-coil                        | Probably damaging      | Damaging  | Non       | Non                          | 0.0000                        | 0.0027  | -                   | - - -       | 1.00                    |
| rs130072    | 31112484          | 15   | c.G1880A                  | p.Arg627Gln | A      | Coiled-coil                        | Probably damaging      | Damaging  | Conserved | 0.0867                       | 0.0877                        | 0.0375  | 2.47                | 1.51 - 4.05 | 4.25 x 10 <sup>-4</sup> |
| rs130074    | 31111174          | 16   | c.G1917T                  | p.Gln639His | T      | Coiled-coil                        | Probably damaging      | Damaging  | Non       | 0.0233                       | 0.1667                        | 0.1920  | 0.84                | 0.60 - 1.16 | 2.81 x 10 <sup>-1</sup> |
| rs116969494 | 31111148          | 16   | c.A1943T                  | p.Lys648Met | T      | Coiled-coil                        | Probably damaging      | Damaging  | Conserved | 0.0002                       | 0.0789                        | 0.0955  | 0.81                | 0.52 - 1.26 | 3.48 x 10 <sup>-1</sup> |
| rs73397100  | 31111125          | 16   | c.C1966T                  | p.Arg656Cys | T      | Coiled-coil                        | Probably damaging      | Damaging  | Conserved | 0.0004                       | 0.0789                        | 0.0955  | 0.81                | 0.52 - 1.26 | 3.48 x 10 <sup>-1</sup> |
| rs1576      | 31110391          | 18   | c.C2327G                  | p.Ser776Cys | G      | Non                                | Benign                 | Tolerated | Non       | 0.3228                       | 0.0819                        | 0.0429  | 2.09                | 1.26 - 3.45 | 5.20 x 10 <sup>-3</sup> |

Sequencing analysis focused on variants resulting in amino acid substitution, though synonymous variants were also observed. <sup>a</sup>The positions of rs72856718 and rs3130453 were determined as based on transcript variant 2 (NM\_001105563), while the positions of other variants were based on transcript variant 3 (NM\_019052) (Supplementary Fig. 7). <sup>b</sup>Sequences of cDNA for *CCHCR1*. <sup>c</sup>Coiled-coil structure prediction in the reference sequence (GRCh37/hg19) using COILS v2.2. <sup>d</sup>Allele frequencies in European Americans reported in NHLBI Exome Sequencing Project. <sup>e</sup>Allele frequencies from this study.



**Supplementary Table 9**  
**Haplotype analysis of 22 SNVs with amino acid substitution in *CCHCR1***

| Haplotype | SNV <sup>a</sup> |           |          |          |          |          |            |          |           |          |          |             |           |             | Frequency |             |             | Haplotype association |          |             |            |        |        |         |             |                         |                         |
|-----------|------------------|-----------|----------|----------|----------|----------|------------|----------|-----------|----------|----------|-------------|-----------|-------------|-----------|-------------|-------------|-----------------------|----------|-------------|------------|--------|--------|---------|-------------|-------------------------|-------------------------|
|           | rs72856718       | rs3130453 | rs130075 | rs130065 | rs130076 | rs130066 | rs11540822 | rs130067 | rs2027937 | rs130068 | rs130069 | rs147733073 | rs2073720 | rs750668764 | rs130079  | rs142986308 | rs202129359 | rs130072              | rs130074 | rs116969494 | rs73397100 | rs1576 | Case   | Control | OR          | (95% CI)                | P                       |
| Hap01     | G                | G         | G        | C        | C        | C        | T          | A        | G         | C        | G        | G           | A         | C           | G         | C           | G           | G                     | G        | A           | C          | C      | 0.1667 | 0.1223  | 1.43        | 1.02 - 2.00             | 3.97 x 10 <sup>-2</sup> |
| Hap02     | G                | G         | A        | C        | C        | C        | T          | A        | G         | C        | G        | G           | A         | C           | G         | C           | G           | G                     | G        | A           | C          | C      | 0.0906 | 0.1295  | 0.68        | 0.45 - 1.01             | 5.02 x 10 <sup>-2</sup> |
| Hap03     | G                | A         | G        | C        | C        | G        | T          | A        | G         | C        | G        | G           | A         | C           | G         | C           | G           | G                     | G        | A           | C          | C      | 0.0029 | 0.0000  | -           | - - -                   | 2.34 x 10 <sup>-1</sup> |
| Hap04     | G                | A         | G        | C        | C        | G        | T          | C        | G         | C        | G        | G           | A         | C           | G         | C           | G           | G                     | G        | A           | C          | C      | 0.2865 | 0.3170  | 0.87        | 0.66 - 1.13             | 2.86 x 10 <sup>-1</sup> |
| Hap05     | T                | A         | G        | C        | C        | G        | T          | C        | G         | C        | G        | G           | A         | C           | G         | C           | G           | G                     | G        | A           | C          | C      | 0.0058 | 0.0000  | -           | - - -                   | 5.45 x 10 <sup>-2</sup> |
| Hap06     | G                | A         | G        | C        | C        | G        | T          | C        | A         | T        | G        | G           | A         | C           | G         | C           | G           | G                     | G        | A           | C          | C      | 0.0439 | 0.0223  | 2.06        | 1.06 - 4.00             | 3.95 x 10 <sup>-2</sup> |
| Hap07     | G                | A         | G        | C        | C        | C        | T          | A        | G         | C        | A        | G           | A         | C           | G         | C           | G           | G                     | G        | A           | C          | C      | 0.0029 | 0.0045  | 0.65        | 0.08 - 5.63             | 6.85 x 10 <sup>-1</sup> |
| Hap08     | G                | A         | G        | C        | C        | G        | T          | C        | G         | C        | G        | G           | A         | C           | G         | C           | G           | G                     | G        | A           | C          | C      | 0.0029 | 0.0009  | 3.29        | 0.20 - 52.9             | 4.14 x 10 <sup>-1</sup> |
| Hap09     | G                | G         | G        | C        | C        | C        | T          | A        | G         | C        | G        | C           | A         | C           | G         | C           | G           | G                     | G        | A           | C          | C      | 0.0468 | 0.0652  | 0.71        | 0.41 - 1.23             | 5.41 x 10 <sup>-1</sup> |
| Hap10     | G                | G         | A        | C        | C        | C        | T          | A        | G         | C        | G        | C           | A         | C           | G         | C           | G           | G                     | G        | A           | C          | C      | 0.0000 | 0.0009  | -           | - - -                   | 1.00                    |
| Hap11     | G                | A         | G        | C        | C        | G        | T          | C        | G         | C        | G        | G           | A         | A           | G         | C           | G           | G                     | G        | A           | C          | C      | 0.0117 | 0.0027  | 4.45        | 0.99 - 20.1             | 5.43 x 10 <sup>-2</sup> |
| Hap12     | G                | A         | G        | C        | C        | G        | T          | C        | G         | C        | G        | G           | A         | C           | G         | C           | G           | G                     | G        | A           | C          | C      | 0.0088 | 0.0018  | 4.98        | 0.83 - 30.1             | 7.94 x 10 <sup>-2</sup> |
| Hap13     | G                | G         | G        | C        | C        | C        | T          | A        | G         | C        | G        | G           | A         | C           | G         | C           | A           | G                     | G        | A           | C          | C      | 0.0000 | 0.0027  | -           | - - -                   | 1.00                    |
| Hap14     | G                | G         | G        | C        | C        | C        | T          | A        | G         | T        | G        | G           | G         | C           | G         | C           | G           | A                     | G        | A           | C          | C      | 0.0029 | 0.0000  | -           | - - -                   | 2.34 x 10 <sup>-1</sup> |
| Hap15     | G                | G         | G        | C        | C        | C        | T          | A        | G         | C        | G        | G           | A         | C           | G         | C           | G           | G                     | T        | A           | C          | C      | 0.0029 | 0.0000  | -           | - - -                   | 2.34 x 10 <sup>-1</sup> |
| Hap16     | G                | G         | G        | C        | C        | C        | T          | A        | G         | T        | G        | G           | A         | C           | G         | C           | G           | G                     | T        | A           | C          | C      | 0.0585 | 0.0670  | 0.86        | 0.51 - 1.45             | 7.67 x 10 <sup>-1</sup> |
| Hap17     | G                | A         | G        | C        | C        | C        | T          | A        | G         | T        | G        | G           | A         | C           | G         | C           | G           | G                     | T        | A           | C          | C      | 0.0029 | 0.0000  | -           | - - -                   | 2.34 x 10 <sup>-1</sup> |
| Hap18     | G                | G         | G        | C        | C        | C        | T          | A        | G         | C        | G        | C           | A         | C           | G         | C           | G           | G                     | T        | A           | C          | C      | 0.0029 | 0.0000  | -           | - - -                   | 2.34 x 10 <sup>-1</sup> |
| Hap19     | G                | G         | G        | C        | C        | C        | T          | A        | G         | T        | G        | G           | G         | C           | G         | C           | G           | G                     | T        | A           | C          | C      | 0.0965 | 0.1241  | 0.75        | 0.5 - 1.12              | 1.51 x 10 <sup>-1</sup> |
| Hap20     | G                | G         | G        | C        | C        | C        | T          | A        | G         | T        | G        | C           | G         | C           | G         | C           | G           | G                     | T        | A           | C          | C      | 0.0000 | 0.0009  | -           | - - -                   | 1.00                    |
| Hap21     | G                | G         | G        | C        | C        | C        | T          | A        | G         | T        | G        | G           | G         | C           | G         | C           | G           | A                     | T        | A           | C          | C      | 0.0029 | 0.0000  | -           | - - -                   | 2.34 x 10 <sup>-1</sup> |
| Hap22     | G                | G         | G        | C        | C        | C        | T          | A        | G         | C        | G        | G           | A         | C           | G         | C           | G           | G                     | G        | T           | T          | C      | 0.0789 | 0.0946  | 0.82        | 0.53 - 1.27             | 3.74 x 10 <sup>-1</sup> |
| Hap23     | G                | G         | G        | C        | C        | C        | T          | A        | G         | C        | G        | C           | A         | C           | G         | C           | G           | G                     | G        | T           | T          | C      | 0.0000 | 0.0009  | -           | - - -                   | 1.00                    |
| Hap24     | G                | A         | G        | T        | T        | G        | T          | A        | G         | T        | G        | G           | A         | C           | T         | C           | G           | G                     | G        | A           | C          | G      | 0.0000 | 0.0054  | -           | - - -                   | 3.45 x 10 <sup>-1</sup> |
| Hap25     | T                | G         | G        | C        | C        | A        | A          | G        | T         | G        | G        | A           | C         | G           | C         | G           | A           | G                     | A        | C           | G          | 0.0058 | 0.0125 | 0.46    | 0.10 - 2.05 | 2.66 x 10 <sup>-1</sup> |                         |
| Hap26     | T                | G         | G        | C        | C        | C        | A          | A        | G         | T        | G        | G           | A         | C           | G         | T           | G           | A                     | G        | A           | C          | G      | 0.0760 | 0.0250  | 3.41        | 1.94 - 5.99             | 3.39 x 10 <sup>-5</sup> |

<sup>a</sup>All SNVs with amino acid substitution used in analysis of haplotypes. Gray area indicates relationship between rs142986308 and Hap26.

## Supplementary Table 10

Allele frequency of rs142986308 in gnomAD v2.1.1 (<https://gnomad.broadinstitute.org/>)

| Population             | Allele Count | Allele Number | Allele Frequency |
|------------------------|--------------|---------------|------------------|
| East Asian             | 553          | 19946         | 0.02772          |
| South Asian            | 11           | 30616         | 0.00028          |
| African                | 1            | 24934         | 0.00004          |
| European (non-Finnish) | 4            | 129060        | 0.00003          |
| Latino                 | 0            | 35432         | 0.00000          |
| Ashkenazi Jewish       | 0            | 10350         | 0.00000          |
| European (Finnish)     | 0            | 24126         | 0.00000          |

**Supplementary Table 11**

**Homology of amino acid sequence to Hap26 in various species**

|              | Hap25 | Pan troglodytes<br>NP_001009009 | Macaca mulatta<br>NP_001108422 | Canis lupus familiaris<br>XP_532064 | Bos taurus<br>NP_001019707 | Mus musculus<br>NP_666360 | Xenopus tropicalis<br>NP_001116918 |
|--------------|-------|---------------------------------|--------------------------------|-------------------------------------|----------------------------|---------------------------|------------------------------------|
| Identity (%) | 99.87 | 98.59                           | 95.50                          | 83.61                               | 63.50                      | 72.96                     | 32.51                              |

## Supplementary Table 12

List of 265 probes showing greater than 2-fold up- or down-regulation in Cchcr1 mice as compared to wild type.

| Rank* | ProbeName      | GeneSymbol        | Regulation | AA mouse 01 | AA mouse 02 | Chr. | GeneName (type of keratin)                                         | GenbankAccession |
|-------|----------------|-------------------|------------|-------------|-------------|------|--------------------------------------------------------------------|------------------|
|       |                |                   |            | Fold change | Fold change |      |                                                                    |                  |
| 1     | A_51_P221823   | <i>Krtap21-1</i>  | up         | 3,298       | 11,957      | 16   | keratin associated protein 21-1                                    | NM_028621        |
| 2     | A_51_P380991   | <i>Krt34</i>      | up         | 3,019       | 9,125       | 11   | keratin 34 (Hair keratin)                                          | NM_027563        |
| 3     | A_55_P2095054  | <i>Krtap6-1</i>   | up         | 2,522       | 6,552       | 16   | keratin associated protein 6-1                                     | NM_010672        |
| 4     | A_52_P321831   | <i>Krtap3-1</i>   | up         | 2,402       | 6,325       | 11   | keratin associated protein 3-1                                     | NM_023511        |
| 5     | A_55_P2151225  | <i>Krtap16-1</i>  | up         | 1,938       | 6,126       | 16   | keratin associated protein 16-1                                    | NM_130870        |
| 6     | A_55_P1985648  | <i>Krtap6-2</i>   | up         | 1,861       | 5,741       | 16   | keratin associated protein 6-2                                     | NM_010673        |
| 7     | A_51_P100624   | <i>Krtap9-3</i>   | up         | 1,966       | 4,668       | 11   | keratin associated protein 9-3                                     | NM_029351        |
| 8     | A_55_P2154994  | <i>Krtap28-13</i> | up         | 1,297       | 5,534       | 1    | keratin associated protein 28-13                                   | XM_006543615     |
| 9     | A_55_P2088755  | <i>Krtap4-1</i>   | up         | 1,755       | 3,959       | 11   | keratin associated protein 4-1                                     | NM_001048196     |
| 10    | A_51_P104681   | <i>Krtap6-5</i>   | up         | 1,709       | 3,845       | 16   | keratin associated protein 6-5                                     | NM_130856        |
| 11    | A_52_P463962   | <i>Krtap16-3</i>  | up         | 1,319       | 4,169       | 16   | keratin associated protein 16-3                                    | NM_183296        |
| 12    | A_55_P2032930  | <i>Krtap3-3</i>   | up         | 1,281       | 3,848       | 11   | keratin associated protein 3-3                                     | NM_025524        |
| 13    | A_55_P2092475  | <i>Krtap20-2</i>  | up         | 1,293       | 3,687       | 16   | keratin associated protein 20-2                                    | NM_001163615     |
| 14    | A_51_P172424   | <i>Krtap4-16</i>  | up         | 1,255       | 2,507       | 11   | keratin associated protein 4-16                                    | NM_001013823     |
| 15    | A_51_P132400   | <i>Krtap14</i>    | up         | 881         | 2,568       | 16   | keratin associated protein 14                                      | NM_013707        |
| 16    | A_51_P189899   | <i>Olfr1134</i>   | up         | 784         | 2,816       | 2    | olfactory receptor 1134                                            | NM_147030        |
| 17    | A_55_P2140022  | <i>Krt35</i>      | up         | 693         | 2,093       | 11   | keratin 35 (Hair keratin)                                          | NM_016880        |
| 18    | A_55_P2086334  | <i>Krt85</i>      | up         | 729         | 1,906       | 15   | keratin 85 (Hair keratin)                                          | NM_016879        |
| 19    | A_55_P1966450  | <i>Krt83</i>      | up         | 570         | 1,926       | 15   | keratin 83 (Hair keratin)                                          | NM_001003668     |
| 20    | A_55_P2006812  | <i>Krtap11-1</i>  | up         | 596         | 1,697       | 16   | keratin associated protein 11-1                                    | NM_001113406     |
| 21    | A_55_P2154987  | <i>Krtap5-2</i>   | up         | 431         | 2,278       | 7    | keratin associated protein 5-2                                     | NM_027844        |
| 22    | A_51_P269721   | <i>Krtap28-13</i> | up         | 442         | 1,647       | 1    | keratin associated protein 28-13                                   | XM_896507        |
| 23    | A_55_P2042161  | <i>Krtap26-1</i>  | up         | 426         | 1,593       | 16   | keratin associated protein 26-1                                    | NM_027105        |
| 24    | A_55_P2009001  | <i>Gprc5d</i>     | up         | 441         | 1,510       | 6    | G protein-coupled receptor, family C, group 5, member D            | NM_001205396     |
| 25    | A_55_P2005525  | <i>Krtap12-1</i>  | up         | 239         | 1,414       | 10   | keratin associated protein 12-1                                    | NM_010670        |
| 26    | A_51_P475816   | <i>Krtap2-4</i>   | up         | 373         | 819         | 11   | keratin associated protein 2-4                                     | NM_027800        |
| 27    | A_55_P2027213  | <i>Krtap20-2</i>  | up         | 315         | 876         | 16   | keratin associated protein 20-2                                    | NM_001163615     |
| 28    | A_51_P450549   | <i>Padi3</i>      | up         | 307         | 842         | 4    | peptidyl arginine deiminase, type III                              | NM_011060        |
| 29    | A_55_P2017347  | <i>Krtap11-1</i>  | up         | 232         | 560         | 16   | keratin associated protein 11-1                                    | NM_001113406     |
| 30    | A_55_P2070940  | <i>Krtap20-2</i>  | up         | 205         | 583         | 16   | keratin associated protein 20-2                                    | NM_001163615     |
| 31    | A_51_P468456   | <i>S100a3</i>     | up         | 181         | 624         | 3    | S100 calcium binding protein A3                                    | NM_011310        |
| 32    | A_51_P501873   | <i>Krt26</i>      | up         | 219         | 499         | 11   | keratin 26 (Inner root sheath in hair follicle)                    | NM_001033397     |
| 33    | A_55_P1985298  | <i>Krtap5-2</i>   | up         | 181         | 508         | 7    | keratin associated protein 5-2                                     | NM_027844        |
| 34    | A_52_P468068   | <i>Tchh</i>       | up         | 221         | 405         | 3    | trichohyalin                                                       | NM_001163098     |
| 35    | A_55_P2158067  | <i>Krtap4-16</i>  | up         | 191         | 438         | 11   | keratin associated protein 4-16                                    | NM_001013823     |
| 36    | A_55_P2110698  | <i>Krtap4-9</i>   | up         | 203         | 343         | 11   | keratin associated protein 4-9                                     | NM_001085548     |
| 37    | A_66_P138462   | <i>Spr2h</i>      | up         | 192         | 286         | 3    | small proline-rich protein 2H                                      | NM_011474        |
| 38    | A_55_P2091831  | <i>Krtap1-4</i>   | up         | 146         | 280         | 11   | keratin associated protein 1-4                                     | NM_001039502     |
| 39    | A_55_P1976972  | <i>Krt28</i>      | up         | 143         | 276         | 11   | keratin 28 (Inner root sheath in hair follicle)                    | NM_027574        |
| 40    | A_55_P2145626  | <i>Krt82</i>      | up         | 95          | 413         | 15   | keratin 82 (Hair keratin)                                          | NM_053249        |
| 41    | A_55_P2178698  | <i>Gprc5d</i>     | up         | 115         | 333         | 6    | G protein-coupled receptor, family C, group 5, member D            | NM_053118        |
| 42    | A_51_P136680   | <i>Krtap31-1</i>  | up         | 80          | 475         | 11   | keratin associated protein 31-1                                    | NM_027568        |
| 43    | A_66_P135018   | <i>Krtap5-1</i>   | up         | 112         | 323         | 7    | keratin associated protein 5-1                                     | NM_015808        |
| 44    | A_55_P2006311  | <i>Krtap9-1</i>   | up         | 141         | 226         | 11   | keratin associated protein 9-1                                     | NM_015741        |
| 45    | A_52_P90805    | <i>Lrrc15</i>     | up         | 117         | 265         | 16   | leucine rich repeat containing 15                                  | NM_028973        |
| 46    | A_66_P114558   | <i>Krtap1-3</i>   | up         | 127         | 238         | 11   | keratin associated protein 1-3                                     | NM_001085526     |
| 47    | A_55_P2139703  | <i>Krtap5-4</i>   | up         | 77          | 315         | 7    | keratin associated protein 5-4                                     | NM_015809        |
| 48    | A_55_P2009732  | <i>Prr9</i>       | up         | 105         | 220         | 3    | proline rich 9                                                     | NM_175424        |
| 49    | A_55_P2140042  | <i>Krt31</i>      | up         | 88          | 247         | 11   | keratin 31 (Hair keratin)                                          | NM_010659        |
| 50    | A_55_P2060011  | <i>Krtap5-5</i>   | up         | 77          | 271         | 7    | keratin associated protein 5-5                                     | NM_001037822     |
| 51    | A_55_P2111172  | <i>Mecom</i>      | up         | 57          | 335         | 3    | MDS1 and EVH1 complex locus                                        | NM_021442        |
| 52    | A_51_P493437   | <i>Krtap28-10</i> | up         | 77          | 234         | 1    | keratin associated protein 28-10                                   | AKI60243         |
| 53    | A_55_P1973970  | <i>Krt73</i>      | up         | 82          | 195         | 15   | keratin 73 (Inner root sheath in hair follicle)                    | NM_212485        |
| 54    | A_51_P474701   | <i>Fbp1</i>       | up         | 74          | 212         | 13   | fructose bisphosphate 1                                            | NM_019395        |
| 55    | A_51_P259694   | <i>Panlyp</i>     | up         | 82          | 172         | 7    | phospholipase A2 inhibitor and LY6/PLAUR domain containing         | NM_001037143     |
| 56    | A_55_P2095859  | <i>Rdh18-ps</i>   | up         | 39          | 290         | 10   | retinol dehydrogenase 18, pseudogene                               | NR_037604        |
| 57    | A_55_P1985304  | <i>Krtap5-3</i>   | up         | 49          | 230         | 7    | keratin associated protein 5-3                                     | NM_023860        |
| 58    | A_55_P2043639  | <i>Rpl6</i>       | up         | 38          | 250         | 5    | ribosomal protein L6                                               | NM_011290        |
| 59    | A_55_P2403159  | <i>Fam26d</i>     | up         | 66          | 138         | 10   | family with sequence similarity 26, member D                       | NM_001081165     |
| 60    | A_55_P2052145  | <i>Ly6g6d</i>     | up         | 46          | 197         | 17   | lymphocyte antigen 6 complex, locus G6D                            | NM_033478        |
| 61    | A_55_P1964672  | <i>Krt28</i>      | up         | 57          | 136         | 11   | keratin 28 (Inner root sheath in hair follicle)                    | NM_027574        |
| 62    | A_55_P1966445  | <i>Krt81</i>      | up         | 47          | 160         | 15   | keratin 81 (Hair keratin)                                          | NM_001166157     |
| 63    | A_55_P1997126  | <i>Cxse</i>       | up         | 62          | 110         | 1    | cathepsin E                                                        | NM_007799        |
| 64    | A_55_P2055727  | <i>Vmn1r52</i>    | up         | 48          | 140         | 6    | vomeronal 1 receptor 52                                            | NM_053222        |
| 65    | A_55_P2071716  | <i>Klre1</i>      | up         | 25          | 201         | 6    | killer cell lectin-like receptor family E member 1                 | NM_153590        |
| 66    | A_55_P2030269  | <i>Dnaab6</i>     | up         | 26          | 158         | 6    | dynein, axonemal, heavy chain 6                                    | NM_001164669     |
| 67    | A_55_P2047778  | <i>Krtap4-8</i>   | up         | 43          | 93          | 11   | keratin associated protein 4-8                                     | NM_001085547     |
| 68    | A_55_P2006436  | <i>Olfr282</i>    | up         | 27          | 150         | 15   | olfactory receptor 282                                             | NM_146457        |
| 69    | A_51_P264695   | <i>Crym</i>       | up         | 42          | 91          | 7    | crystallin, mu                                                     | NM_016669        |
| 70    | A_55_P2114308  | <i>Krt40</i>      | up         | 29          | 113         | 11   | keratin 40 (Hair keratin)                                          | NM_001039666     |
| 71    | A_55_P19988714 | <i>Psors1c2</i>   | up         | 31          | 95          | 17   | psoriasis susceptibility 1 candidate 2 (human)                     | NM_020576        |
| 72    | A_51_P338031   | <i>Tpnl1</i>      | up         | 40          | 70          | 7    | transient receptor potential cation channel, subfamily M, member 1 | NM_018752        |
| 73    | A_51_P143712   | <i>Tdh</i>        | up         | 43          | 62          | 14   | L-threonine dehydrogenase                                          | NM_021480        |
| 74    | A_55_P1961477  | <i>Kcnj11</i>     | up         | 20          | 128         | 7    | potassium inwardly rectifying channel, subfamily J, member 11      | NM_010602        |
| 75    | A_52_P534583   | <i>Abap</i>       | up         | 44          | 56          | 0    | alpha hemoglobin stabilizing protein                               | NM_133245        |
| 76    | A_55_P2165439  | <i>Krt36</i>      | up         | 30          | 79          | 11   | keratin 36 (Hair keratin)                                          | NM_001174099     |
| 77    | A_55_P2173768  | <i>Pkhd1</i>      | up         | 21          | 107         | 1    | polycystic kidney and hepatic disease 1                            | AKI43992         |
| 78    | A_55_P2114492  | <i>Icmt</i>       | up         | 18          | 115         | 4    | isoprenylcysteine carboxyl methyltransferase                       | NM_133788        |
| 79    | A_52_P163660   | <i>Krtap3-2</i>   | up         | 27          | 76          | 11   | keratin associated protein 3-2                                     | NM_025720        |
| 80    | A_55_P2065159  | <i>Krtap9-5</i>   | up         | 23          | 89          | 11   | keratin associated protein 9-5                                     | NM_001085527     |
| 81    | A_52_P383089   | <i>Cd4</i>        | up         | 15          | 105         | 6    | CD4 antigen                                                        | NM_013488        |
| 82    | A_51_P480202   | <i>Dlx2</i>       | up         | 24          | 50          | 2    | distal-less homeobox 2                                             | NM_010054        |
| 83    | A_55_P2140571  | <i>Krtap24-1</i>  | up         | 22          | 51          | 16   | keratin associated protein 24-1                                    | NM_001163141     |
| 84    | A_55_P2140057  | <i>Krt32</i>      | up         | 18          | 59          | 11   | keratin 32 (Hair keratin)                                          | NM_001159374     |
| 85    | A_55_P2134938  | <i>Krtap10-4</i>  | up         | 15          | 70          | 10   | keratin associated protein 10-4                                    | NM_001135991     |
| 86    | A_51_P183561   | <i>Cxcl2</i>      | up         | 17          | 51          | 15   | cold shock domain containing C2, RNA binding                       | NM_145473        |
| 87    | A_51_P484158   | <i>Stcap1</i>     | up         | 20          | 38          | 5    | six transmembrane epithelial antigen of the prostate 1             | NM_027399        |
| 88    | A_55_P2109407  | <i>Rnase12</i>    | up         | 20          | 35          | 14   | ribonuclease, RNase A family, 12 (non-active)                      | NM_001011875     |
| 89    | A_52_P482251   | <i>Gjb6</i>       | up         | 20          | 34          | 14   | gap junction protein, beta 6                                       | NM_001010937     |
| 90    | A_55_P1958919  | <i>Olfr1347</i>   | up         | 10          | 67          | 7    | olfactory receptor 1347                                            | NM_146385        |
| 91    | A_55_P2002477  | <i>Zfp707</i>     | up         | 11          | 58          | 15   | zinc finger protein 707                                            | NM_001081065     |
| 92    | A_55_P2181634  | <i>Spej2</i>      | up         | 7.9         | 78          | 15   | sperm flagellar 2                                                  | XM_006520087     |
| 93    | A_55_P2043777  | <i>Tpnl1</i>      | up         | 13          | 47          | 7    | transient receptor potential cation channel, subfamily M, member 1 | BC082560         |
| 94    | A_51_P324814   | <i>Krt18</i>      | up         | 15          | 38          | 15   | keratin 18 (Epithelial keratin)                                    | NM_010664        |
| 95    | A_55_P2078960  | <i>Tdh</i>        | up         | 19          | 29          | 14   | L-threonine dehydrogenase                                          | NM_021480        |
| 96    | A_55_P1998456  | <i>Birc7</i>      | down       | 39          | 14          | 2    | baculoviral IAP repeat-containing 7 (livin)                        | NM_001163247     |
| 97    | A_55_P2038752  | <i>Olfr18</i>     | up         | 11          | 48          | 9    | olfactory receptor 18                                              | NM_146663        |
| 98    | A_55_P2081283  | <i>Dlx4</i>       | up         | 17          | 32          | 11   | distal-less homeobox 4                                             | NM_007867        |
| 99    | A_51_P468073   | <i>Ggt1</i>       | up         | 16          | 31          | 10   | gamma-glutamyltransferase 1                                        | NM_008116        |
| 100   | A_55_P2092671  | <i>Npyc</i>       | up         | 15          | 31          | 1    | natrictic peptide type C                                           | NM_010933        |
| 101   | A_55_P2000034  | <i>Cryba4</i>     | up         | 13          | 36          | 5    | crystallin, beta A4                                                | NM_021351        |

|     |               |                   |      |     |     |    |                                                                                                  |              |
|-----|---------------|-------------------|------|-----|-----|----|--------------------------------------------------------------------------------------------------|--------------|
| 102 | A_52_P498193  | <i>Aldh1l2</i>    | down | 28  | 15  | 10 | aldehyde dehydrogenase 1 family, member L2                                                       | NM_153543    |
| 103 | A_51_P108659  | <i>Pon1</i>       | down | 17  | 24  | 6  | paraoxonase 1                                                                                    | NM_011134    |
| 104 | A_51_P205385  | <i>Uox</i>        | up   | 12  | 33  | 3  | urate oxidase                                                                                    | NM_009474    |
| 105 | A_55_P2162379 | <i>Actb2</i>      | up   | 12  | 29  | 13 | actin, beta-like 2                                                                               | NM_175497    |
| 106 | A_55_P2062469 | <i>Coll2a1</i>    | up   | 15  | 20  | 9  | collagen, type XII, alpha 1                                                                      | NM_001290308 |
| 107 | A_52_P355169  | <i>Tnc</i>        | up   | 16  | 19  | 4  | tenascin C                                                                                       | NM_011607    |
| 108 | A_51_P304397  | <i>Cpm</i>        | up   | 12  | 25  | 10 | carboxypeptidase M                                                                               | NM_027468    |
| 109 | A_55_P1985288 | <i>Bhlha9</i>     | up   | 7.2 | 40  | 11 | basic helix-loop-helix family, member a9                                                         | NM_177182    |
| 110 | A_51_P362066  | <i>Chil1</i>      | up   | 16  | 18  | 1  | chitinase-like 1                                                                                 | NM_007695    |
| 111 | A_52_P69020   | <i>Slc24a5</i>    | up   | 10  | 27  | 2  | solute carrier family 24, member 5                                                               | NM_175034    |
| 112 | A_66_P152496  | <i>Asic3</i>      | up   | 12  | 21  | 5  | acid-sensing (proton-gated) ion channel 3                                                        | AY261387     |
| 113 | A_51_P112734  | <i>Slc7a8</i>     | up   | 10  | 23  | 14 | solute carrier family 7 (cationic amino acid transporter, y+ system), member 8                   | NM_016972    |
| 114 | A_65_P08727   | <i>Adams18</i>    | up   | 12  | 17  | 8  | a disintegrin-like and metallopeptidase (reprolysin type) with thrombospondin type 1 motif, 18   | AK081122     |
| 115 | A_52_P62121   | <i>Gpr37</i>      | up   | 13  | 16  | 6  | G protein-coupled receptor 37                                                                    | NM_010338    |
| 116 | A_55_P2172096 | <i>Mcl1</i>       | up   | 7.9 | 25  | 8  | melanocortin 1 receptor                                                                          | NM_008559    |
| 117 | A_55_P2116435 | <i>Gpr143</i>     | up   | 10  | 19  | X  | G protein-coupled receptor 143                                                                   | NM_010951    |
| 118 | A_55_P2110076 | <i>C1qrf6</i>     | down | 11  | 16  | 15 | C1q and tumor necrosis factor related protein 6                                                  | NM_001204153 |
| 119 | A_55_P2041828 | <i>Tubb3</i>      | up   | 8.7 | 19  | 8  | tubulin, beta 3 class III                                                                        | NM_023279    |
| 120 | A_51_P486810  | <i>Gpx2</i>       | up   | 10  | 17  | 12 | glutathione peroxidase 2                                                                         | NM_030677    |
| 121 | A_55_P2027831 | <i>Cryba4</i>     | up   | 6.9 | 22  | 5  | crystallin, beta A4                                                                              | XM_006534748 |
| 122 | A_51_P142767  | <i>Glt8d2</i>     | down | 15  | 10  | 10 | glycosyltransferase 8 domain containing 2                                                        | NM_029102    |
| 123 | A_52_P399934  | <i>Dusp2</i>      | up   | 7.9 | 19  | 2  | dual specificity phosphatase 2                                                                   | NM_010090    |
| 124 | A_55_P2414619 | <i>Cdh6</i>       | up   | 11  | 13  | 15 | cadherin 6                                                                                       | XM_006520017 |
| 125 | A_55_P2084965 | <i>Kir13</i>      | up   | 11  | 13  | 7  | kallikrein-related peptidase 13                                                                  | NM_001039042 |
| 126 | A_55_P1953573 | <i>Typ1</i>       | up   | 11  | 14  | 4  | tyrosinase-related protein 1                                                                     | NM_031202    |
| 127 | A_55_P1989519 | <i>Fndc1</i>      | down | 6.9 | 21  | 17 | fibronectin type III domain containing 1                                                         | NM_001081416 |
| 128 | A_55_P2100375 | <i>Coll1a1</i>    | up   | 9.1 | 15  | 3  | collagen, type XI, alpha 1                                                                       | NM_007729    |
| 129 | A_55_P2010197 | <i>Serpina10</i>  | up   | 4.9 | 28  | 12 | serine (or cysteine) peptidase inhibitor, clade A (alpha-1 antiprotease, antitrypsin), member 10 | NM_144834    |
| 130 | A_52_P184042  | <i>Adams2</i>     | down | 12  | 12  | 11 | a disintegrin-like and metallopeptidase (reprolysin type) with thrombospondin type 1 motif, 2    | NM_175643    |
| 131 | A_52_P151393  | <i>Lrrc75b</i>    | up   | 8.4 | 16  | 10 | leucine rich repeat containing 75B                                                               | NM_198860    |
| 132 | A_51_P425071  | <i>C1qnf3</i>     | down | 10  | 13  | 15 | C1q and tumor necrosis factor related protein 3                                                  | NM_030888    |
| 133 | A_51_P419637  | <i>Dcik3</i>      | up   | 7.4 | 17  | 9  | doublecortin-like kinase 3                                                                       | NM_172928    |
| 134 | A_51_P282760  | <i>Per2</i>       | down | 4.9 | 24  | 1  | period circadian clock 2                                                                         | NM_011066    |
| 135 | A_55_P1973945 | <i>Krt75</i>      | up   | 7.1 | 16  | 15 | keratin 75 (Hair follicle)                                                                       | NM_133357    |
| 136 | A_51_P455866  | <i>Ejf5</i>       | up   | 8.3 | 13  | 2  | E74-like factor 5                                                                                | NM_010125    |
| 137 | A_55_P2023118 | <i>Prss28</i>     | up   | 4.2 | 26  | 17 | protease, serine 28                                                                              | NM_053259    |
| 138 | A_55_P1999301 | <i>Cyp2e1</i>     | down | 11  | 10  | 7  | cytochrome P450, family 2, subfamily e, polypeptide 1                                            | NM_021282    |
| 139 | A_51_P283968  | <i>Adams18</i>    | up   | 6.4 | 17  | 8  | a disintegrin-like and metallopeptidase (reprolysin type) with thrombospondin type 1 motif, 18   | NM_172466    |
| 140 | A_55_P1988368 | <i>Upp1</i>       | up   | 6.5 | 15  | 11 | uridine phosphorylase 1                                                                          | NM_009477    |
| 141 | A_55_P1955778 | <i>Adams4</i>     | up   | 8.2 | 12  | 1  | a disintegrin-like and metallopeptidase (reprolysin type) with thrombospondin type 1 motif, 4    | NM_172845    |
| 142 | A_55_P2062573 | <i>C1qnf3</i>     | down | 11  | 8.8 | 15 | C1q and tumor necrosis factor related protein 3                                                  | NM_001204134 |
| 143 | A_51_P481398  | <i>Kif11</i>      | up   | 8.1 | 12  | 19 | kinesin family member 11                                                                         | NM_010615    |
| 144 | A_51_P245414  | <i>Kir1</i>       | down | 10  | 9.4 | 7  | kallikrein 1                                                                                     | NM_010639    |
| 145 | A_55_P2104219 | <i>Hoxe13</i>     | up   | 6.5 | 15  | 15 | homeobox C13                                                                                     | NM_010464    |
| 146 | A_55_P2043486 | <i>Mx2</i>        | up   | 5.8 | 16  | 13 | nsh homeobox 2                                                                                   | NM_013601    |
| 147 | A_51_P123405  | <i>Bub1</i>       | up   | 8.0 | 11  | 2  | budding uninhibited by benzimidazoles 1 homolog (S. cerevisiae)                                  | NM_009772    |
| 148 | A_55_P2086329 | <i>Krt85</i>      | up   | 5.4 | 16  | 15 | keratin 85 (Hair keratin)                                                                        | NM_016879    |
| 149 | A_55_P2020532 | <i>BC089491</i>   | up   | 3.8 | 23  | 7  | cDNA sequence BC089491                                                                           | NM_175033    |
| 150 | A_55_P1966690 | <i>Cyp2e1</i>     | down | 9.2 | 9.4 | 7  | cytochrome P450, family 2, subfamily e, polypeptide 1                                            | NM_021282    |
| 151 | A_66_P139618  | <i>Sfu2</i>       | up   | 7.4 | 12  | 16 | stefin A2                                                                                        | NM_001082545 |
| 152 | A_52_P627269  | <i>Ces2b</i>      | down | 6.6 | 13  | 8  | carboxylesterase 2B                                                                              | NM_198171    |
| 153 | A_52_P198898  | <i>Samd5</i>      | up   | 6.4 | 12  | 10 | sterile alpha motif domain containing 5                                                          | NM_177271    |
| 154 | A_52_P514061  | <i>Padi4</i>      | up   | 7.8 | 10  | 4  | peptidyl arginine deiminase, type IV                                                             | NM_011061    |
| 155 | A_55_P2135276 | <i>Mcoln3</i>     | up   | 4.7 | 16  | 3  | mucoilin 3                                                                                       | NM_134160    |
| 156 | A_55_P2002933 | <i>Kir1b5</i>     | down | 16  | 4.6 | 7  | kallikrein 1-related peptidase b5                                                                | NM_008456    |
| 157 | A_52_P227391  | <i>Kif15</i>      | up   | 6.6 | 11  | 9  | kinesin family member 15                                                                         | NM_010620    |
| 158 | A_55_P2279977 | <i>D2Bwg0886e</i> | up   | 3.4 | 22  | 2  | DNA segment, Chr 2, Brigham & Women's Genetics 0886 expressed                                    | BE573844     |
| 159 | A_55_P2023717 | <i>Kcnq5</i>      | down | 12  | 5.6 | 1  | potassium voltage-gated channel, subfamily Q, member 5                                           | NM_023872    |
| 160 | A_51_P486681  | <i>Ap3b2</i>      | up   | 7.4 | 8.9 | 7  | adaptor-related protein complex 3, beta 2 subunit                                                | NM_021492    |
| 161 | A_55_P2090025 | <i>Mest</i>       | up   | 15  | 4.3 | 6  | mesoderm specific transcript                                                                     | NM_001252292 |
| 162 | A_55_P2092219 | <i>Serpina9</i>   | up   | 5.0 | 12  | 12 | serine (or cysteine) peptidase inhibitor, clade A (alpha-1 antiprotease, antitrypsin), member 9  | NM_027997    |
| 163 | A_52_P520466  | <i>Kif18b</i>     | up   | 6.2 | 10  | 11 | kinesin family member 18B                                                                        | NM_197959    |
| 164 | A_51_P162162  | <i>Inmt</i>       | down | 9.0 | 6.4 | 6  | indolethylamine N-methyltransferase                                                              | NM_009349    |
| 165 | A_55_P2005956 | <i>Egfbp2</i>     | down | 14  | 4.0 | 7  | epidermal growth factor binding protein type B                                                   | NM_010115    |
| 166 | A_51_P270949  | <i>Hist1h1b</i>   | up   | 5.4 | 10  | 13 | histone cluster 1, H1b                                                                           | NM_020034    |
| 167 | A_51_P389988  | <i>Slc40a1</i>    | up   | 5.7 | 10  | 1  | solute carrier family 40 (iron-regulated transporter), member 1                                  | NM_016917    |
| 168 | A_55_P1983769 | <i>Birc5</i>      | up   | 5.8 | 9.3 | 11 | baculoviral IAP repeat-containing 5                                                              | NM_001012273 |
| 169 | A_51_P154379  | <i>Tmem150c</i>   | down | 8.8 | 6.0 | 5  | transmembrane protein 150C                                                                       | NM_182841    |
| 170 | A_51_P367866  | <i>Egr1</i>       | up   | 5.1 | 10  | 18 | early growth response 1                                                                          | NM_007913    |
| 171 | A_55_P1969276 | <i>Hhip</i>       | up   | 4.6 | 11  | 8  | Hedgehog-interacting protein                                                                     | NM_020259    |
| 172 | A_55_P2025006 | <i>Kir1b26</i>    | down | 11  | 4.5 | 7  | kallikrein 1-related peptidase b26                                                               | NM_010644    |
| 173 | A_55_P1997141 | <i>Mylb2</i>      | up   | 4.7 | 10  | 2  | myeloblastosis oncogene-like 2                                                                   | NM_008652    |
| 174 | A_52_P68028   | <i>Ace</i>        | down | 10  | 4.6 | 11 | angiotensin I converting enzyme (peptidyl-dipeptidase A) 1                                       | NM_009598    |
| 175 | A_55_P2069221 | <i>Prr11</i>      | up   | 6.2 | 7.6 | 11 | proline rich 11                                                                                  | NM_175563    |
| 176 | A_51_P292008  | <i>Gpx3</i>       | down | 6.5 | 7.2 | 11 | glutathione peroxidase 3                                                                         | NM_008161    |
| 177 | A_55_P1955656 | <i>Ctla2a</i>     | down | 13  | 3.5 | 13 | cytotoxic T lymphocyte-associated protein 2 alpha                                                | NM_007796    |
| 178 | A_51_P207892  | <i>Pla2g5</i>     | down | 6.3 | 7.0 | 4  | phospholipase A2, group V                                                                        | NM_011110    |
| 179 | A_55_P2066309 | <i>Slc39a8</i>    | up   | 5.0 | 8.6 | 3  | solute carrier family 39 (metal ion transporter), member 8                                       | NM_001135150 |
| 180 | A_55_P2016014 | <i>Cpsf4l</i>     | up   | 5.0 | 8.5 | 11 | cleavage and polyadenylation specific factor 4-like                                              | NM_001164532 |
| 181 | A_55_P2158011 | <i>Kustrn</i>     | up   | 5.5 | 7.6 | 2  | kinetochore-localized astrin-SPAG5 binding                                                       | NM_026412    |
| 182 | A_51_P451151  | <i>Ube2c</i>      | up   | 5.3 | 8.0 | 2  | ubiquitin-conjugating enzyme E2C                                                                 | NM_026785    |
| 183 | A_66_P130035  | <i>Kir1b24</i>    | down | 8.9 | 4.6 | 7  | kallikrein 1-related peptidase b24                                                               | NM_010643    |
| 184 | A_55_P1996941 | <i>Ube2c</i>      | up   | 5.6 | 7.2 | 2  | ubiquitin-conjugating enzyme E2C                                                                 | NM_026785    |
| 185 | A_51_P413147  | <i>Kir1b3</i>     | down | 7.3 | 5.3 | 7  | kallikrein 1-related peptidase b3                                                                | NM_008693    |
| 186 | A_55_P2039704 | <i>S100a2</i>     | up   | 4.3 | 8.4 | 3  | S100 calcium binding protein A2                                                                  | NM_001195760 |
| 187 | A_51_P164014  | <i>Cenpe</i>      | up   | 4.7 | 7.6 | 3  | centromere protein E                                                                             | NM_173762    |
| 188 | A_52_P447284  | <i>Ctic6</i>      | up   | 3.6 | 10  | 16 | chloride intracellular channel 6                                                                 | NM_172469    |
| 189 | A_55_P1996963 | <i>Mcl1</i>       | up   | 4.4 | 7.9 | 17 | microtubule crosslinking factor 1                                                                | NM_001114098 |
| 190 | A_51_P419439  | <i>Gnm1</i>       | up   | 3.1 | 11  | 17 | glycine N-methyltransferase                                                                      | NM_010321    |
| 191 | A_55_P2127934 | <i>Palm3</i>      | up   | 4.3 | 8.0 | 8  | paralemmin 3                                                                                     | NM_028877    |
| 192 | A_51_P489522  | <i>Ctla2b</i>     | down | 10  | 3.3 | 13 | cytotoxic T lymphocyte-associated protein 2 beta                                                 | NM_007797    |
| 193 | A_52_P197402  | <i>Tbc1d30</i>    | up   | 4.3 | 7.8 | 10 | TBC1 domain family, member 30                                                                    | NM_029057    |
| 194 | A_51_P329949  | <i>Fam13a</i>     | down | 3.5 | 9.5 | 6  | family with sequence similarity 13, member A                                                     | NM_153574    |
| 195 | A_51_P415395  | <i>C2cd4b</i>     | up   | 3.9 | 8.5 | 9  | C2 calcium-dependent domain containing 4B                                                        | NM_001081314 |
| 196 | A_51_P486239  | <i>Clec3b</i>     | down | 5.6 | 5.8 | 9  | C-type lectin domain family 3, member b                                                          | NM_011606    |
| 197 | A_52_P482897  | <i>Areg</i>       | up   | 3.3 | 9.6 | 5  | amphiregulin                                                                                     | NM_009704    |
| 198 | A_55_P2027386 | <i>Gpr156</i>     | up   | 5.5 | 5.8 | 16 | G protein-coupled receptor 156                                                                   | NM_153394    |
| 199 | A_55_P2117614 | <i>Tufes13c</i>   | up   | 4.4 | 7.2 | 15 | tumor necrosis factor receptor superfamily, member 13c                                           | NM_028075    |
| 200 | A_52_P622850  | <i>Hes5</i>       | up   | 2.1 | 15  | 4  | hairly and enhancer of split 5 (Drosophila)                                                      | NM_010419    |
| 201 | A_51_P259603  | <i>Adcyap1r1</i>  | down | 4.4 | 6.9 | 6  | adenylate cyclase activating polypeptide 1 receptor 1                                            | NM_007407    |
| 202 | A_66_P115004  | <i>Gabrp</i>      | up   | 3.9 | 7.6 | 11 | gamma-aminobutyric acid (GABA) A receptor, pi                                                    | NM_146017    |
| 203 | A_51_P253803  | <i>Mki67</i>      | up   | 4.4 | 6.7 | 7  | antigen identified by monoclonal antibody Ki 67                                                  | NM_001081117 |
| 204 | A_52_P114905  | <i>Iftm10</i>     | up   | 4.3 | 6.9 | 7  | interferon induced transmembrane protein 10                                                      | BC049666     |
| 205 | A_51_P179461  | <i>Eid3</i>       | up   | 5.2 | 5.5 | 10 | EP300 interacting inhibitor of differentiation 3                                                 | NM_025499    |
| 206 | A_55_P2072453 | <i>Marc1</i>      | up   | 8.2 | 3.5 | 1  | mitochondrial amidoxime reducing component 1                                                     | NM_001290273 |

|     |               |                 |      |     |     |    |                                                                                 |              |
|-----|---------------|-----------------|------|-----|-----|----|---------------------------------------------------------------------------------|--------------|
| 207 | A_55_P2158510 | <i>Dcpp2</i>    | down | 7.7 | 3.6 | 17 | demilune cell and parotid protein 2                                             | NM_001039238 |
| 208 | A_52_P374897  | <i>Arg2</i>     | up   | 4.9 | 5.6 | 12 | arginase type II                                                                | NM_009705    |
| 209 | A_55_P2141093 | <i>Eya2</i>     | up   | 4.6 | 6.0 | 2  | eyes absent 2 homolog (Drosophila)                                              | NM_010165    |
| 210 | A_51_P490924  | <i>Hapln4</i>   | down | 4.5 | 5.9 | 8  | hyaluronan and proteoglycan link protein 4                                      | NM_177900    |
| 211 | A_55_P2030368 | <i>Tm7f3</i>    | down | 4.3 | 6.0 | 6  | transmembrane 7 superfamily member 3                                            | NM_026281    |
| 212 | A_55_P1983768 | <i>Birc5</i>    | up   | 4.4 | 5.8 | 11 | baculoviral IAP repeat-containing 5                                             | NM_009689    |
| 213 | A_55_P1994781 | <i>Vamp1</i>    | down | 6.6 | 3.7 | 6  | vesicle-associated membrane protein 1                                           | AK020615     |
| 214 | A_51_P320304  | <i>Plod1</i>    | down | 4.5 | 5.0 | 4  | procollagen-lysine, 2-oxoglutarate 5-dioxygenase 1                              | NM_011122    |
| 215 | A_52_P676819  | <i>Bac1</i>     | up   | 4.4 | 5.1 | 7  | basonectin 1                                                                    | NM_007562    |
| 216 | A_51_P150653  | <i>Ppprv</i>    | up   | 3.8 | 5.9 | 1  | protein tyrosine phosphatase, receptor type, V                                  | NM_007955    |
| 217 | A_52_P341886  | <i>Lzst1</i>    | up   | 2.8 | 8.0 | 8  | leucine zipper, putative tumor suppressor 1                                     | NM_199364    |
| 218 | A_55_P2013019 | <i>Lpar1</i>    | down | 4.1 | 5.4 | 4  | lysophosphatidic acid receptor 1                                                | NM_172989    |
| 219 | A_55_P2035320 | <i>Nfil3</i>    | up   | 4.0 | 5.4 | 13 | nuclear factor, interleukin 3, regulated                                        | NM_017373    |
| 220 | A_52_P639043  | <i>Glt8d2</i>   | down | 5.8 | 3.7 | 10 | glycosyltransferase 8 domain containing 2                                       | NM_029102    |
| 221 | A_55_P2060238 | <i>Iqbf1</i>    | down | 6.2 | 3.3 | 14 | integrin, beta-like 1                                                           | NM_145467    |
| 222 | A_51_P474169  | <i>Proser2</i>  | up   | 2.9 | 7.2 | 2  | proline and serine rich 2                                                       | NM_144883    |
| 223 | A_66_P131110  | <i>Zfp473</i>   | up   | 4.7 | 4.4 | 7  | zinc finger protein 473                                                         | NM_001289836 |
| 224 | A_55_P2034625 | <i>Sema6a</i>   | up   | 5.0 | 4.0 | 18 | sema domain, transmembrane domain (TM), and cytoplasmic domain, (semaphorin) 6A | AK082711     |
| 225 | A_52_P263658  | <i>Hes2</i>     | up   | 3.0 | 6.6 | 4  | hairly enhancer of split 2 (Drosophila)                                         | NM_008236    |
| 226 | A_52_P58283   | <i>Kcna5</i>    | down | 6.4 | 3.0 | 6  | potassium voltage-gated channel, shaker-related subfamily, member 5             | NM_145983    |
| 227 | A_55_P2070733 | <i>Ccdc155</i>  | up   | 2.9 | 6.6 | 7  | coiled-coil domain containing 155                                               | NM_201374    |
| 228 | A_51_P255699  | <i>Mmp3</i>     | down | 6.9 | 2.7 | 9  | matrix metalloproteinase 3                                                      | NM_010809    |
| 229 | A_66_P121480  | <i>Sardh</i>    | up   | 3.1 | 5.4 | 2  | sarcosine dehydrogenase                                                         | NM_138665    |
| 230 | A_52_P145415  | <i>Pch2</i>     | up   | 3.1 | 5.1 | 4  | patched homolog 2                                                               | BC058397     |
| 231 | A_55_P2178539 | <i>Nacc2</i>    | down | 3.5 | 4.4 | 2  | nucleus accumbens associated 2, BEN and BTB (POZ) domain containing             | NM_001037098 |
| 232 | A_66_P130911  | <i>Proser2</i>  | up   | 3.2 | 4.7 | 2  | proline and serine rich 2                                                       | AK132370     |
| 233 | A_55_P2219243 | <i>Usp43</i>    | up   | 3.9 | 3.8 | 11 | ubiquitin specific peptidase 43                                                 | NM_173754    |
| 234 | A_55_P1953030 | <i>Tnfrsf12</i> | down | 2.2 | 6.8 | 11 | tumor necrosis factor (ligand) superfamily, member 12                           | NM_011614    |
| 235 | A_51_P482121  | <i>Edn2</i>     | up   | 4.1 | 4.5 | 4  | endothelin 2                                                                    | NM_007902    |
| 236 | A_55_P2024439 | <i>Gaa</i>      | down | 2.7 | 5.1 | 11 | glucosidase, alpha, acid                                                        | NM_008064    |
| 237 | A_55_P2167530 | <i>Scube3</i>   | up   | 2.7 | 5.1 | 17 | signal peptide, CUB domain, EGF-like 3                                          | XM_006524323 |
| 238 | A_52_P401504  | <i>Thbs4</i>    | up   | 4.3 | 3.2 | 13 | thrombospondin 4                                                                | NM_011582    |
| 239 | A_55_P2105152 | <i>Trim59</i>   | up   | 3.1 | 4.3 | 3  | tripartite motif-containing 59                                                  | NM_025863    |
| 240 | A_66_P111021  | <i>Nlrp6</i>    | down | 3.7 | 3.5 | 7  | NLR family, pyrin domain containing 6                                           | NM_133946    |
| 241 | A_52_P35048   | <i>Serpinf1</i> | down | 3.0 | 4.4 | 11 | serine (or cysteine) peptidase inhibitor, clade F, member 1                     | NM_011340    |
| 242 | A_51_P295034  | <i>Klrlb4</i>   | down | 3.7 | 3.0 | 7  | kallikrein 1-related peptidase b4                                               | NM_010915    |
| 243 | A_55_P1974923 | <i>Olfj568</i>  | down | 3.3 | 3.3 | 7  | olfactory receptor 568                                                          | NM_147091    |
| 244 | A_55_P1961499 | <i>Lyc6l</i>    | down | 2.7 | 4.0 | 15 | lymphocyte antigen 6 complex, locus C1                                          | NM_001252058 |
| 245 | A_51_P116651  | <i>Dpt</i>      | down | 2.5 | 4.1 | 1  | dermatopontin                                                                   | NM_019759    |
| 246 | A_55_P2106074 | <i>Wfikn1</i>   | up   | 2.4 | 4.3 | 17 | WAP, FS, Ig, KU, and NTR-containing protein 1                                   | NM_001100454 |
| 247 | A_51_P247184  | <i>Npr3</i>     | up   | 4.7 | 2.1 | 15 | natriuretic peptide receptor 3                                                  | NM_008728    |
| 248 | A_52_P281145  | <i>Kank4</i>    | up   | 3.9 | 2.6 | 4  | KN motif and ankyrin repeat domains 4                                           | NM_172872    |
| 249 | A_51_P183894  | <i>Fbxo15</i>   | down | 4.5 | 2.1 | 18 | F-box protein 15                                                                | NM_015798    |
| 250 | A_55_P2062437 | <i>Begain</i>   | up   | 2.4 | 3.9 | 12 | brain-enriched guanylate kinase-associated                                      | NM_001163175 |
| 251 | A_55_P2085412 | <i>Ankle1</i>   | up   | 2.6 | 3.6 | 8  | ankyrin repeat and LEM domain containing 1                                      | NM_172756    |
| 252 | A_55_P2035315 | <i>Rasgef1b</i> | up   | 2.6 | 3.5 | 5  | RasGEF domain family, member 1B                                                 | NM_145839    |
| 253 | A_51_P200494  | <i>Klrlb1</i>   | down | 2.4 | 3.6 | 7  | kallikrein 1-related peptidase b1                                               | NM_010645    |
| 254 | A_55_P2042247 | <i>Nlrp2</i>    | down | 4.2 | 2.0 | 7  | NLR family, pyrin domain containing 2                                           | NM_177690    |
| 255 | A_55_P2061991 | <i>Pnlc1</i>    | up   | 2.6 | 3.3 | 17 | poly(A)-specific ribonuclease (PARN)-like domain containing 1                   | NM_001034866 |
| 256 | A_55_P2144075 | <i>Pofut2</i>   | down | 2.6 | 3.3 | 10 | protein O-fucosyltransferase 2                                                  | NM_030262    |
| 257 | A_55_P1974527 | <i>Ntsr2</i>    | down | 3.0 | 2.7 | 12 | neurotensin receptor 2                                                          | NM_008747    |
| 258 | A_55_P2181538 | <i>Sulf1d1</i>  | down | 3.7 | 2.1 | 5  | sulfotransferase family 1D, member 1                                            | NM_016771    |
| 259 | A_55_P2185397 | <i>Cop2</i>     | down | 2.2 | 3.4 | 11 | coatamer protein complex, subunit zeta 2                                        | NM_019877    |
| 260 | A_51_P164939  | <i>Tmem150a</i> | down | 2.8 | 2.6 | 6  | transmembrane protein 150A                                                      | NM_144916    |
| 261 | A_52_P602091  | <i>Cyflr</i>    | down | 2.3 | 3.2 | 18 | colony stimulating factor 1 receptor                                            | NM_001037859 |
| 262 | A_55_P2162160 | <i>Amp32a</i>   | down | 2.9 | 2.3 | 9  | acidic (leucine-rich) nuclear phosphoprotein 32 family, member A                | NM_009672    |
| 263 | A_55_P2116647 | <i>Myo1c</i>    | down | 2.6 | 2.5 | 11 | myosin IC                                                                       | NM_001080774 |
| 264 | A_55_P2014755 | <i>Pclo</i>     | up   | 3.2 | 2.0 | 5  | piccolo (presynaptic cytomatrix protein)                                        | NM_001110796 |
| 265 | A_66_P114614  | <i>Ndst1</i>    | down | 2.5 | 2.5 | 18 | N-deacetylase/N-sulfotransferase (heparan glucosaminyl) 1                       | NM_008306    |

<sup>†</sup>Fold change values, calculated using mean normalized expression values for both AA mice, are listed in descending order.

**Supplementary Table 13**  
**45 genes showing over 2-fold up- or down-regulation in AA patients with the T allele of rs142986308 as compared to an AA patient without the allele**

| Genesymbol        | Fold change value |              | Regulation |
|-------------------|-------------------|--------------|------------|
|                   | AA patient 1      | AA patient 2 |            |
|                   | (rs142986308:C/T) |              |            |
| <i>ANGPTL7</i>    | 9.00              | 8.23         | up         |
| <i>KRT25</i>      | 7.11              | 8.44         | up         |
| <i>KRT74</i>      | 6.23              | 8.66         | up         |
| <i>KRT28</i>      | 6.54              | 7.71         | up         |
| <i>KRT71</i>      | 4.53              | 4.47         | up         |
| <i>KRT73</i>      | 4.03              | 4.03         | up         |
| <i>TCHH</i>       | 4.03              | 3.76         | up         |
| <i>KRT27</i>      | 3.19              | 3.49         | up         |
| <i>FABP9</i>      | 2.74              | 3.52         | up         |
| <i>AMTN</i>       | 2.56              | 3.34         | up         |
| <i>SLC7A5</i>     | 2.69              | 3.00         | up         |
| <i>PADI3</i>      | 2.75              | 2.87         | up         |
| <i>GJB6</i>       | 2.78              | 2.39         | up         |
| <i>ISOC1</i>      | 2.31              | 2.74         | up         |
| <i>SLC7A1</i>     | 2.26              | 2.51         | up         |
| <i>HIST2H2BA</i>  | 2.25              | 2.39         | up         |
| <i>KRTAP5-5</i>   | 2.39              | 21.6         | down       |
| <i>KRTAP5-6</i>   | 2.39              | 10.8         | down       |
| <i>KRTAP5-10</i>  | 3.67              | 8.73         | down       |
| <i>KRTAP10-11</i> | 3.26              | 8.79         | down       |
| <i>KRTAP5-8</i>   | 2.23              | 9.61         | down       |
| <i>KRTAP10-4</i>  | 2.79              | 8.22         | down       |
| <i>KRTAP19-6</i>  | 5.59              | 3.58         | down       |
| <i>KRTAP13-2</i>  | 2.53              | 6.52         | down       |
| <i>KRTAP6-1</i>   | 3.15              | 5.25         | down       |
| <i>KRTAP10-3</i>  | 2.04              | 5.27         | down       |
| <i>KRTAP9-7</i>   | 4.06              | 2.95         | down       |
| <i>PLA2G2E</i>    | 2.63              | 3.90         | down       |
| <i>BMP2</i>       | 2.37              | 3.58         | down       |
| <i>PDK4</i>       | 2.99              | 2.94         | down       |
| <i>ZNF652</i>     | 3.54              | 2.28         | down       |
| <i>KRTAP20-1</i>  | 2.59              | 3.04         | down       |
| <i>KRTAP10-9</i>  | 2.28              | 3.35         | down       |
| <i>SNORD14A</i>   | 2.90              | 2.32         | down       |
| <i>KRTAP12-1</i>  | 2.44              | 2.53         | down       |
| <i>TNS4</i>       | 2.68              | 2.22         | down       |
| <i>KRTAP19-7</i>  | 2.49              | 2.34         | down       |
| <i>KRT83</i>      | 2.76              | 2.03         | down       |
| <i>OGFRL1</i>     | 2.17              | 2.53         | down       |
| <i>PLBI</i>       | 2.01              | 2.60         | down       |
| <i>KRTAP10-5</i>  | 2.05              | 2.45         | down       |
| <i>KRTAP5-2</i>   | 2.10              | 2.35         | down       |
| <i>LPCAT3</i>     | 2.20              | 2.18         | down       |
| <i>IGHD2-21</i>   | 2.07              | 2.14         | down       |
| <i>HIF1A</i>      | 2.11              | 2.09         | down       |
